# Supplementary material for: The Isolation and Full-Length Transcriptome Sequencing of a Novel Nidovirus and Response of Its Infection in Japanese Flounder (Paralichthys olivaceus)
Source: MDPI journal article supplement (doi:10.3390/v14061216), 2022-06-02
Supplement: s1 [file s1]

Table S1 Primer information used in this study

| Gene           | Primer sequence (5'-3')                              | Application      |
|----------------|------------------------------------------------------|------------------|
| V-ORF1a        | F: CGCGCACCACTTAAAACACA<br>R: CGTGAATTGTTGTGCGGGTT   | Virus validation |
| <i>β-actin</i> | F: AGAGCTATGAGCTGCCCCGAC<br>R: CTGGGTACATGGTGGTTCCTC | Virus validation |
| <i>rrp1b</i>   | F: AGGGCTTGTGGCGTGATA<br>R: GGATGTGAGTAATCACCGAGT    | qRT-PCR          |
| <i>plcg2</i>   | F: CCGCTAAAGAACGGCTAC<br>R: CTGGCTGGAGGACGAGTA       | qRT-PCR          |
| <i>pycard</i>  | F: CAAGACCTCTGACGGAAG<br>R: CTGTCATTGCCAGGGTCT       | qRT-PCR          |
| <i>vbp1</i>    | F: TCTCAGGCTGCATCCACA<br>R: GAGACCAGTTCACCACCATC     | qRT-PCR          |
| <i>ank2</i>    | F: CGATGAAATGCCTGACCTG<br>R: CTTACGCTCCACGCCAT       | qRT-PCR          |
| <i>methfd2</i> | F: GGGGAGTCTGGGAAATGAT<br>R: GAAATGGTGACCGTGGCA      | qRT-PCR          |
| <i>skor1b</i>  | F: ATGGCGAGGCAGATGTAG<br>R: GCTCAGCACGGGAAGATA       | qRT-PCR          |
| <i>b3gnt2</i>  | F: CTGCTGCTGGTGGTCAAGT<br>R: CTGGAGGAGGTCGTTGTGA     | qRT-PCR          |
| <i>bhmt</i>    | F: GGGCAGACACTCAGTATCAC<br>R: GGGCAGACACTCAGTATCAC   | qRT-PCR          |
| <i>rft2</i>    | F: GCCTGCTCTAGTGGCTTTA<br>R: GCTGATACTGGGCTTGGA      | qRT-PCR          |
| <i>18s</i>     | F: GCTGATACTGGGCTTGGA<br>R: AGTTGGTGGAGCGATTG        | qRT-PCR          |
