# Supplementary material for: The Isolation and Full-Length Transcriptome Sequencing of a Novel Nidovirus and Response of Its Infection in Japanese Flounder (Paralichthys olivaceus)
Source: MDPI journal article supplement (doi:10.3390/v14061216), 2022-06-02
Supplement: s1 [file s1]

Table S6. Length distribution of full-length sequencing reads before and after correction with Illumina RNA-Seq data.

| Sample | Type           | Total nucleotides | Total number | Mean length | Min length | Max length | N50  | N90  |
|--------|----------------|-------------------|--------------|-------------|------------|------------|------|------|
| R      | Before correct | 464072319         | 212319       | 2186        | 198        | 13823      | 2643 | 1399 |
|        | After correct  | 463495705         | 212319       | 2184        | 182        | 12987      | 2641 | 1398 |
| S      | Before correct | 536642204         | 183681       | 2922        | 181        | 14634      | 3429 | 1888 |
|        | After correct  | 535777939         | 183681       | 2917        | 182        | 14621      | 3420 | 1887 |
