# Supplementary material for: The Isolation and Full-Length Transcriptome Sequencing of a Novel Nidovirus and Response of Its Infection in Japanese Flounder (Paralichthys olivaceus)
Source: MDPI journal article supplement (doi:10.3390/v14061216), 2022-06-02
Supplement: s1 [file s1]

Table S7. Summary of mapping rate of full-length sequencing reads to Japanese flounder reference genome.

| Sample | Total reads | Total mapped       | Unmapped          | Multiple mapped | Uniquely mapped    | Reads map to '+'   | Reads map to '-'  |
|--------|-------------|--------------------|-------------------|-----------------|--------------------|--------------------|-------------------|
| R      | 212319      | 184371<br>(86.84%) | 27948<br>(13.16%) | 2938<br>(1.38%) | 181433<br>(85.45%) | 100678<br>(47.42%) | 80755<br>(38.03%) |
| S      | 183681      | 155400<br>(84.6%)  | 28281<br>(15.4%)  | 1578<br>(0.86%) | 153822<br>(83.74%) | 81780<br>(44.52%)  | 72042<br>(39.22%) |
