# Supplementary material for: The Isolation and Full-Length Transcriptome Sequencing of a Novel Nidovirus and Response of Its Infection in Japanese Flounder (Paralichthys olivaceus)
Source: MDPI journal article supplement (doi:10.3390/v14061216), 2022-06-02
Supplement: s1 [file s1]

Table S9. Summary of enriched metabolism related signaling pathways.

| Pathways                                    | DEGs number |
|---------------------------------------------|-------------|
| Metabolic pathways                          | 144         |
| Pyrimidine metabolism                       | 26          |
| Purine metabolism                           | 31          |
| Oxidative phosphorylation                   | 22          |
| Glutathione metabolism                      | 11          |
| Carbon metabolism                           | 17          |
| Propanoate metabolism                       | 7           |
| Cysteine and methionine metabolism          | 8           |
| Drug metabolism - other enzymes             | 7           |
| Glyoxylate and dicarboxylate metabolism     | 6           |
| Pyruvate metabolism                         | 7           |
| Fatty acid metabolism                       | 8           |
| Porphyrin and chlorophyll metabolism        | 6           |
| Citrate cycle (TCA cycle)                   | 6           |
| Biosynthesis of amino acids                 | 10          |
| Valine, leucine and isoleucine degradation  | 7           |
| Fatty acid biosynthesis                     | 4           |
| One carbon pool by folate                   | 4           |
| Fatty acid degradation                      | 6           |
| Synthesis and degradation of ketone bodies  | 2           |
| 2-Oxocarboxylic acid metabolism             | 4           |
| Glycine, serine and threonine metabolism    | 6           |
| Arachidonic acid metabolism                 | 6           |
| Selenocompound metabolism                   | 3           |
| Alanine, aspartate and glutamate metabolism | 5           |
| Glycerolipid metabolism                     | 6           |
| Pentose phosphate pathway                   | 4           |
| beta-Alanine metabolism                     | 4           |
| Tryptophan metabolism                       | 5           |
| Glycerophospholipid metabolism              | 8           |
| Riboflavin metabolism                       | 2           |
| Sulfur metabolism                           | 2           |
| Butanoate metabolism                        | 3           |
| Ether lipid metabolism                      | 4           |
| Inositol phosphate metabolism               | 6           |
| Folate biosynthesis                         | 2           |
| Arginine and proline metabolism             | 6           |
| Primary bile acid biosynthesis              | 2           |
| Terpenoid backbone biosynthesis             | 2           |
| Nicotinate and nicotinamide metabolism      | 3           |

|                                                            |   |
|------------------------------------------------------------|---|
| Nitrogen metabolism                                        | 2 |
| Tyrosine metabolism                                        | 2 |
| Amino sugar and nucleotide sugar metabolism                | 3 |
| Retinol metabolism                                         | 2 |
| Fructose and mannose metabolism                            | 2 |
| Linoleic acid metabolism                                   | 1 |
| Sphingolipid metabolism                                    | 2 |
| Drug metabolism - cytochrome P450                          | 1 |
| Starch and sucrose metabolism                              | 1 |
| Glycosaminoglycan degradation                              | 2 |
| Lysine degradation                                         | 4 |
| Glycosphingolipid biosynthesis - lacto and neolacto series | 2 |
| Glycolysis / Gluconeogenesis                               | 4 |
| Fatty acid elongation                                      | 2 |
| Pantothenate and CoA biosynthesis                          | 1 |
| Biosynthesis of unsaturated fatty acids                    | 1 |
| N-Glycan biosynthesis                                      | 2 |
| Mucin type O-Glycan biosynthesis                           | 1 |
| Other types of O-glycan biosynthesis                       | 1 |
