# Supplementary material for: The Isolation and Full-Length Transcriptome Sequencing of a Novel Nidovirus and Response of Its Infection in Japanese Flounder (Paralichthys olivaceus)
Source: MDPI journal article supplement (doi:10.3390/v14061216), 2022-06-02
Supplement: s1 [file s1]

Table S8. Summary of isoform.

|                              | R       | S       |
|------------------------------|---------|---------|
| Isoform number               | 45901   | 42177   |
| Isoforms of known genes      | 2641    | 2502    |
| Novel isoform of known genes | 40423   | 38716   |
| Isoforms of novel genes      | 2837    | 959     |
| Isoform mean length          | 2565.32 | 3151.50 |
| N50                          | 2981    | 3711    |
