# Supplementary material for: The Isolation and Full-Length Transcriptome Sequencing of a Novel Nidovirus and Response of Its Infection in Japanese Flounder (Paralichthys olivaceus)
Source: MDPI journal article supplement (doi:10.3390/v14061216), 2022-06-02
Supplement: s1 [file s1]

Table S2. Summary of RNA-seq data.

| Sample | Total clean reads | Total mapping rate | FPKM Interval |              |              |             |
|--------|-------------------|--------------------|---------------|--------------|--------------|-------------|
|        |                   |                    | 1-5           | 5-15         | 15-60        | >60         |
| R1     | 41175958          | 88.71%             | 3485(14.32%)  | 4293(17.64%) | 4384(18.02%) | 1645(6.76%) |
| R2     | 55451184          | 89.74%             | 3593(14.76%)  | 4406(18.11%) | 4251(17.47%) | 1512(6.21%) |
| R3     | 53561556          | 89.13%             | 3779(15.53%)  | 4915(20.20%) | 4914(20.19%) | 1445(5.94%) |
| S1     | 45660498          | 90.95%             | 3134(12.88%)  | 4222(17.35%) | 4468(18.36%) | 1681(6.91%) |
| S2     | 51103116          | 91.40%             | 3115(12.80%)  | 4242(17.43%) | 4509(18.53%) | 1679(6.90%) |
| S3     | 55892426          | 90.83%             | 3146(12.93%)  | 4208(17.29%) | 4472(18.38%) | 1736(7.13%) |
