# Supplementary material for: The Isolation and Full-Length Transcriptome Sequencing of a Novel Nidovirus and Response of Its Infection in Japanese Flounder (Paralichthys olivaceus)
Source: MDPI journal article supplement (doi:10.3390/v14061216), 2022-06-02
Supplement: s1 [file s1]

Table S5. Similarity of amino sequence sequences of CSBV-Bces-Po19 and other aquatic oncotshaviruses.

| Virus strain (species) | Amino acid sequence identity (%) |        |       |       |        |
|------------------------|----------------------------------|--------|-------|-------|--------|
|                        | ORF 1a                           | ORF 1b | S     | M     | N      |
| CSBV WHQSR4345         | 99.49                            | 99.21  | 98.51 | 98.78 | 99.44  |
| CSBV HB93              | 85.99                            | 94.34  | 98.42 | 98.78 | 100.00 |
| CSBV Cefas-W054        | 94.80                            | 98.77  | 97.76 | 97.55 | 85.39  |
| CSBV NIDO              | 93.85                            | 99.04  | 97.10 | 96.33 | 84.27  |
| ASBV                   | 97.56                            | 99.04  | 97.43 | 99.18 | 84.27  |
| YCBV                   | 91.75                            | 98.64  | 93.53 | 84.84 | 97.74  |
