# Supplementary material for: The Isolation and Full-Length Transcriptome Sequencing of a Novel Nidovirus and Response of Its Infection in Japanese Flounder (Paralichthys olivaceus)
Source: MDPI journal article supplement (doi:10.3390/v14061216), 2022-06-02
Supplement: s1 [file s1]

Table S4. Similarity of nucleotides sequences of CSBV Bces-Po19 and other aquatic oncotshaviruses.

| Virus strain (species) | Genome size (nt) | Nucleotide sequence identity (%) |        |        |       |       |       |
|------------------------|------------------|----------------------------------|--------|--------|-------|-------|-------|
|                        |                  | Whole genome sequences           | ORF 1a | ORF 1b | S     | M     | N     |
| CSBV WHQSR4345         | 26466            | 98.62                            | 99.50  | 97.96  | 99.06 | 98.51 | 99.25 |
| CSBV HB93              | 25971            | 96.13                            | 85.71  | 93.44  | 98.95 | 99.19 | 99.44 |
| CSBV Cefas-W054        | 25969            | 95.21                            | 94.33  | 97.30  | 98.26 | 97.43 | 86.59 |
| CSBV NIDO              | 27004            | 94.69                            | 93.24  | 97.59  | 97.71 | 96.88 | 86.03 |
| ASBV                   | 26496            | 96.65                            | 96.94  | 97.44  | 98.23 | 98.37 | 86.03 |
| YCBV                   | 26985            | 93.17                            | 91.50  | 96.13  | 94.69 | 85.13 | 97.19 |
