# Supplementary material for: The Isolation and Full-Length Transcriptome Sequencing of a Novel Nidovirus and Response of Its Infection in Japanese Flounder (Paralichthys olivaceus)
Source: MDPI journal article supplement (doi:10.3390/v14061216), 2022-06-02
Supplement: s1 [file s1]

Table S11. Gene alternative splicing involved in signal pathways.

| Gene and alternative splicing isoform    | log2FoldChange(SvsR) of gene | log2FoldChange(SvsR) of isoform | Pathway                                                          |
|------------------------------------------|------------------------------|---------------------------------|------------------------------------------------------------------|
| <i>alas2</i><br><i>alas2_novel03</i>     | 1.1161                       | 1.35227                         | Metabolic pathways                                               |
|                                          |                              |                                 | Porphyrin and chlorophyll metabolism                             |
|                                          |                              |                                 | Glycine, serine and threonine metabolism                         |
| <i>tktl1</i><br><i>tktl1_as</i>          | -1.2287                      | -1.45178                        | Metabolic pathways                                               |
|                                          |                              |                                 | Carbon metabolism                                                |
|                                          |                              |                                 | Biosynthesis of amino acids                                      |
| <i>hsp90b1</i><br><i>hsp90b1_novel18</i> | 1.4176                       | 2.12447                         | NOD-like receptor signaling pathway                              |
| <i>gtse1</i><br><i>gtse1_as</i>          | 2.6997                       | 2.80394                         | p53 signaling pathway                                            |
| <i>tubb</i><br><i>tubb_novel01</i>       | 0.73377                      | 0.819256                        | Phagosome                                                        |
| <i>pan3</i><br><i>pan3_novel01</i>       | -0.92075                     | -1.1412                         | RNA degradation                                                  |
| <i>EIF4G1</i><br><i>EIF4G1_novel05</i>   | 1.3054                       | 1.43197                         | RNA transport                                                    |
| <i>aldocb</i><br><i>aldocb_novel01</i>   | 1.3487                       | 1.32807                         | Metabolic pathways                                               |
|                                          |                              |                                 | Carbon metabolism                                                |
|                                          |                              |                                 | Biosynthesis of amino acids                                      |
|                                          |                              |                                 | Pentose phosphate pathway                                        |
|                                          |                              |                                 | Glycolysis / Gluconeogenesis and Fructose and mannose metabolism |
| <i>gspt1</i><br><i>gspt1_novel01</i>     | 1.9074                       | 1.95804                         | mRNA surveillance pathway                                        |
| <i>rmb8a</i><br><i>rmb8a_novel01</i>     | 0.78439                      | 0.770334                        | RNA transport                                                    |
|                                          |                              |                                 | Spliceosome                                                      |
|                                          |                              |                                 | mRNA surveillance pathway                                        |
| <i>sesn1</i><br><i>sesn1_novel03</i>     | -0.70797                     | -0.911889                       | p53 signal pathway                                               |
| <i>EIF2S2</i><br><i>EIF2S2_novel01</i>   | 1.1146                       | 1.04703                         | RNA transport                                                    |
| <i>nmrk2</i><br><i>nmrk2_novel02</i>     | 0.93177                      | 0.982451                        | Metabolic pathways                                               |
|                                          |                              |                                 | Nicotinate and nicotinamide metabolism                           |
| <i>PTGES3</i><br><i>PTGES3_novel03</i>   | 1.2216                       | 1.25039                         | Metabolic pathways                                               |
|                                          |                              |                                 | Arachidonic acid metabolism                                      |
| <i>ran</i><br><i>ran_novel05</i>         | 1.1096                       | 1.1465                          | RNA transport                                                    |
|                                          |                              |                                 | Ribosome biogenesis in eukaryotes                                |
| <i>ncf4</i>                              | -0.98717                     | -2.17532                        | Phagosome                                                        |

|                     |  |  |  |
|---------------------|--|--|--|
| <i>ncf4_novel17</i> |  |  |  |
|---------------------|--|--|--|
