# Supplementary material for: The Isolation and Full-Length Transcriptome Sequencing of a Novel Nidovirus and Response of Its Infection in Japanese Flounder (Paralichthys olivaceus)
Source: MDPI journal article supplement (doi:10.3390/v14061216), 2022-06-02
Supplement: s1 [file s1]

Table S3. The candidate virus that annotated from contigs of small RNA sequence using diseased fish tissue homogenate inoculated JFB cells.

| Database                   | Virus name                                                                                                                                                                  | Annotated<br>contigs<br>number | Annotated<br>contigs<br>length | Hit<br>length | Annotated contigs id                                                                                   |
|----------------------------|-----------------------------------------------------------------------------------------------------------------------------------------------------------------------------|--------------------------------|--------------------------------|---------------|--------------------------------------------------------------------------------------------------------|
| NR                         | Chinook salmon bafinivirus<br>MG600027.1 Chinook salmon<br>bafinivirus strain WHQSR4345                                                                                     | 1                              | 247                            | 79            | NODE_9_length_247_cov_0.352679                                                                         |
| NT                         | lab protein, spike protein,<br>membrane protein, and<br>nucleoprotein genes, complete cds<br>MT123520.1 Chinook salmon<br>bafinivirus isolate CefasW054,<br>complete genome | 2                              | 595                            | 577           | NODE_8_length_348_cov_1.378462,<br>NODE_9_length_247_cov_0.352679                                      |
| NT                         | MT123520.1 Chinook salmon<br>bafinivirus isolate CefasW054,<br>complete genome                                                                                              | 1                              | 184                            | 72            | NODE_15_length_184_cov_0.130435                                                                        |
| Virus RefSeq<br>Nucleotide | Proteus phage vB_PmiS-TH                                                                                                                                                    | 1                              | 283                            | 247           | Contig8                                                                                                |
| Virus RefSeq<br>Nucleotide | Chinook salmon bafinivirus<br>isolate NIDO                                                                                                                                  | 3                              | 721                            | 444           | NODE_15_length_184_cov_0.130435,<br>NODE_8_length_348_cov_1.378462,<br>NODE_12_length_189_cov_1.536145 |
| Virus RefSeq<br>Nucleotide | Shamonda virus N and NSs genes                                                                                                                                              | 2                              | 2992                           | 182           | NODE_2_length_1194_cov_46.914603, Contig4                                                              |
| Virus RefSeq<br>Nucleotide | Choristoneura occidentalis<br>granulovirus                                                                                                                                  | 5                              | 10626                          | 458           | Contig10, Contig3,<br>Locus_1_Transcript_12/25_Confidence_0.185_Length_2533,<br>Contig2, Contig1       |
| Virus RefSeq<br>Protein    | Chinook salmon bafinivirus                                                                                                                                                  | 2                              | 431                            | 103           | NODE_9_length_247_cov_0.352679,<br>NODE_15_length_184_cov_0.130435                                     |
